# Supplementary material
Source: PubMed Central journal article supplement (PMC4134871)

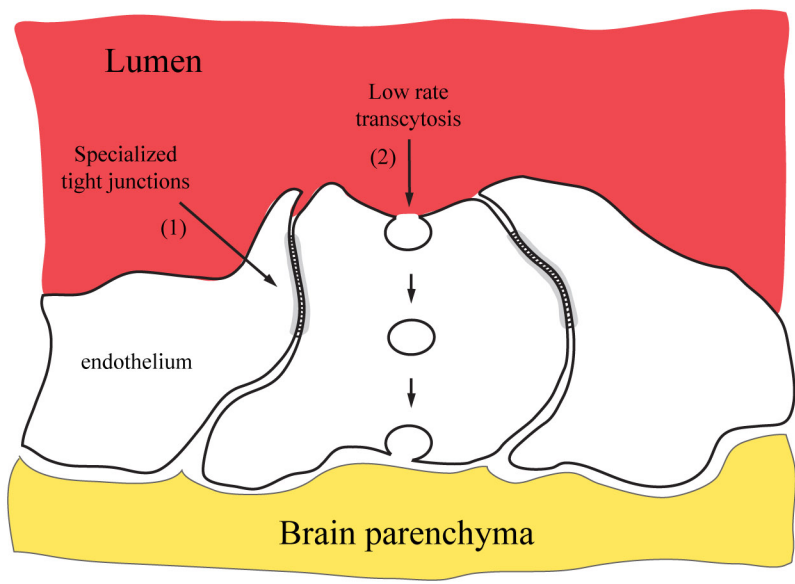

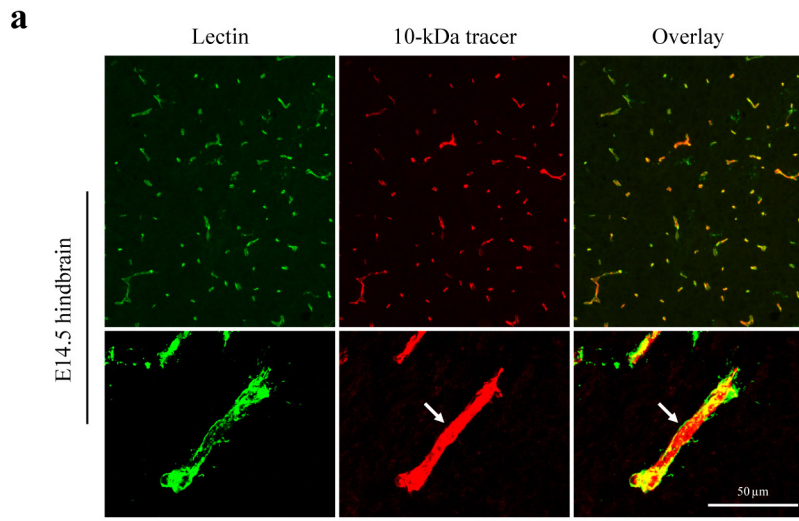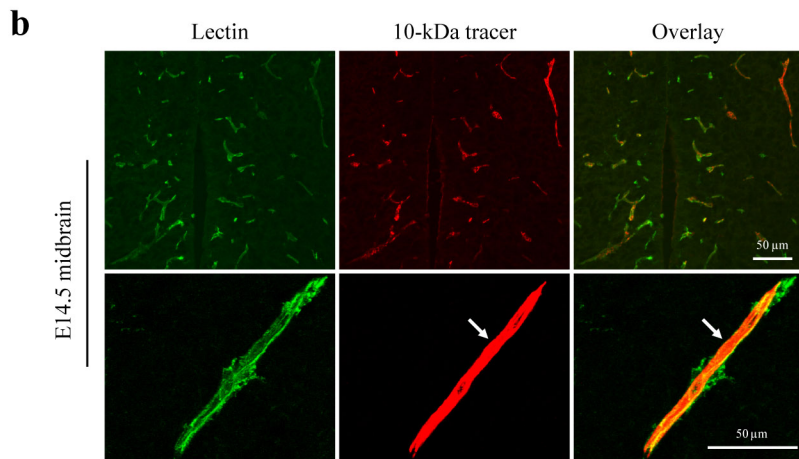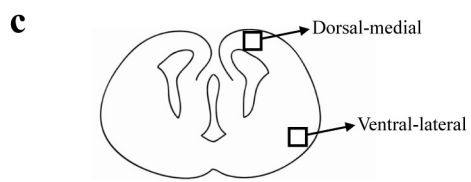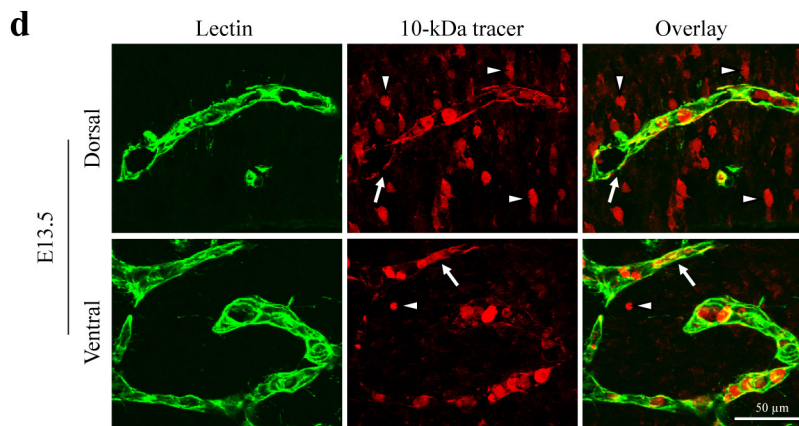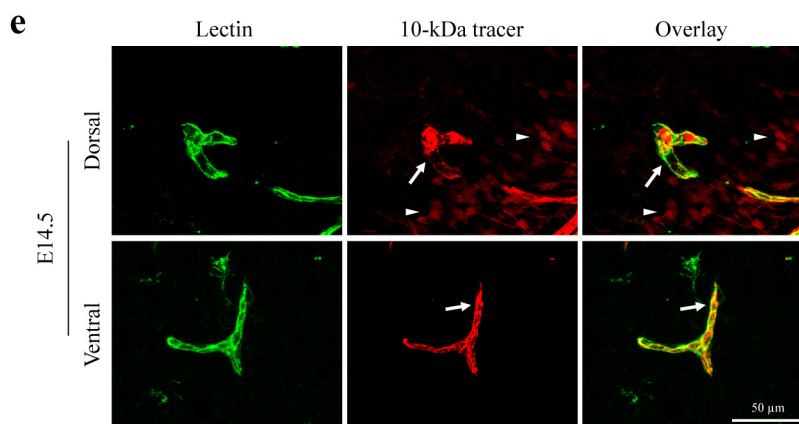

**a**

| Probe set    | Gene Symbol | Cortex GFP+ | Lung GFP+ | Cortex/Lung |
|--------------|-------------|-------------|-----------|-------------|
| 1418788_at   | Tie2        | 2765.0      | 5040.7    | 0.5         |
| 1417839_at   | Cldn5       | 4978.0      | 4709.7    | 1.1         |
| 1440926_at   | flt1        | 771.5       | 606.1     | 1.3         |
| 1449379_at   | VegfR2      | 3578.6      | 2115.3    | 1.7         |
| 1433956_at   | VE-cadherin | 2422.9      | 3572.4    | 0.7         |
| 1421287_a_at | PECAM       | 364.4       | 725.4     | 0.5         |

**b**

| Probe set    | Gene Symbol | Cortex GFP+ | Lung GFP+ | Cortex/Lung |
|--------------|-------------|-------------|-----------|-------------|
| 1423343_at   | Slco1c1     | 2918.1      | 51.7      | 56.4        |
| 1454622_at   | Slc38a5     | 3007.5      | 124.7     | 24.1        |
| 1435418_at   | Slc22a8     | 253.6       | 11.28     | 22.5        |
| 1448299_at   | Slc1a1      | 565.9       | 47.4      | 11.9        |
| 1418706_at   | Slc38a3     | 917.2       | 117.9     | 7.8         |
| 1418326_at   | Slc7a5      | 5913.1      | 1050.9    | 5.6         |
| 1433933_s_at | Slco2b1     | 994.3       | 207       | 4.8         |
| 1447227_at   | Slc40a1     | 81.8        | 20.3      | 4.0         |
| 1436137_at   | Slc6a17     | 567         | 147.5     | 3.8         |
| 1436417_at   | Slc19a3     | 124.6       | 34.4      | 3.6         |
| 1451486_at   | Slc46a3     | 371.3       | 112.2     | 3.3         |
| 1422906_at   | Abcg2       | 458.6       | 166.2     | 2.8         |
| 1436164_at   | Slc30a1     | 2768        | 1178.4    | 2.3         |
| 1434773_a_at | Slc2a1      | 9337.6      | 4144.4    | 2.3         |
| 1419759_at   | Abcb1a      | 1520        | 676.8     | 2.2         |
| 1454991_at   | Slc7a1      | 8403.4      | 4403.5    | 1.9         |
| 1429154_at   | Slc35f2     | 369.6       | 211       | 1.8         |
| 1433751_at   | Slc39a10    | 3222.8      | 2074.3    | 1.6         |
| 1437149_at   | Slc6a6      | 2096.5      | 1367.6    | 1.5         |
| 1433750_at   | Slc31a1     | 1666.4      | 1389.2    | 1.2         |
| 1447851_x_at | Atp10a      | 328.4       | 276.6     | 1.2         |
| 1443870_at   | Abcc4       | 138.4       | 117.5     | 1.2         |
| 1424211_at   | Slc25a33    | 99.2        | 93        | 1.1         |
| 1426082_a_at | Slc16a4     | 94.3        | 95.8      | 1.0         |
| 1418445_at   | Slc16a2     | 1953.4      | 2069.4    | 0.9         |
| 1415802_at   | Slc16a1     | 925.1       | 989.5     | 0.9         |
| 1423109_s_at | Slc25a20    | 310.4       | 410.7     | 0.8         |
| 1417022_at   | Slc7a3      | 51.5        | 74.4      | 0.7         |
| 1453149_at   | Slc25a32    | 109.2       | 204.7     | 0.5         |

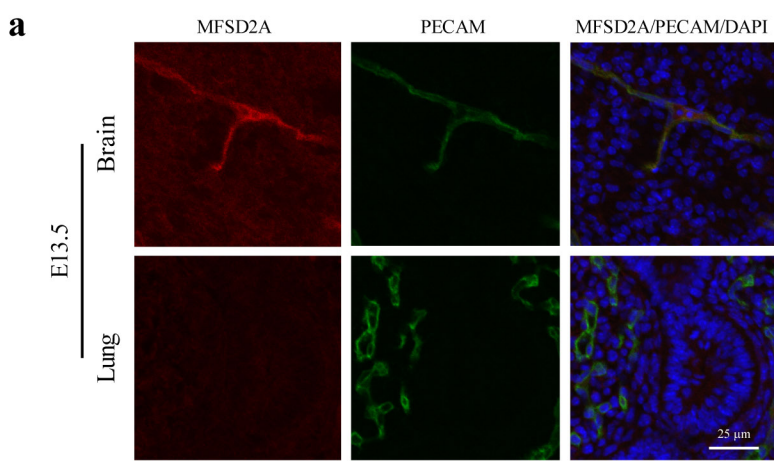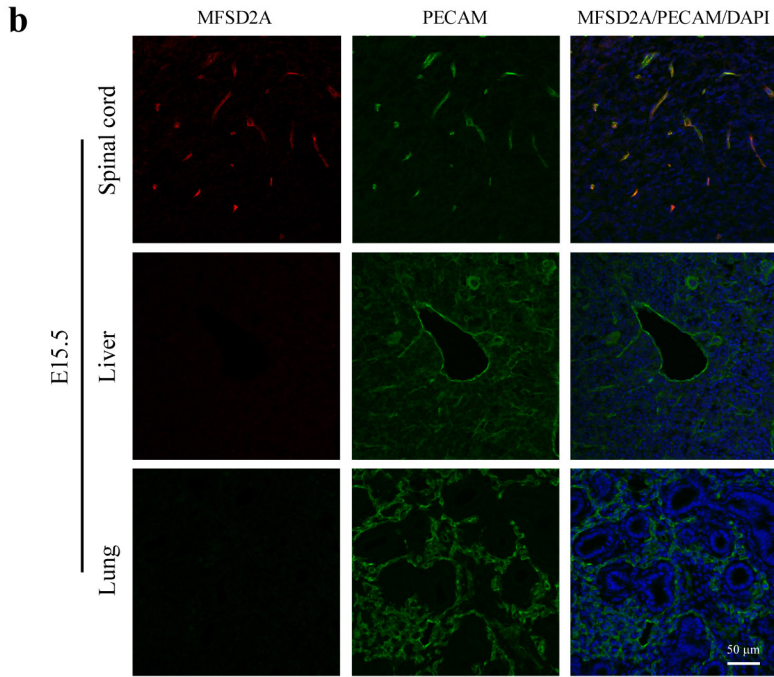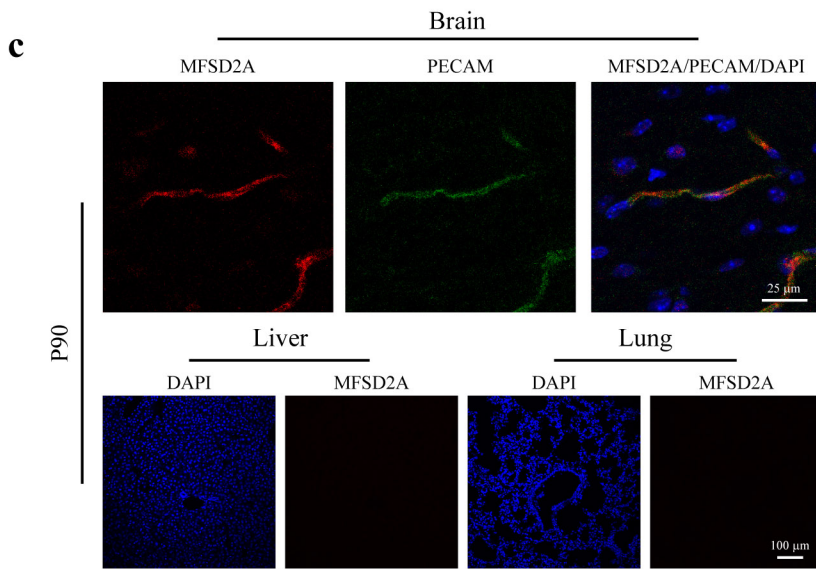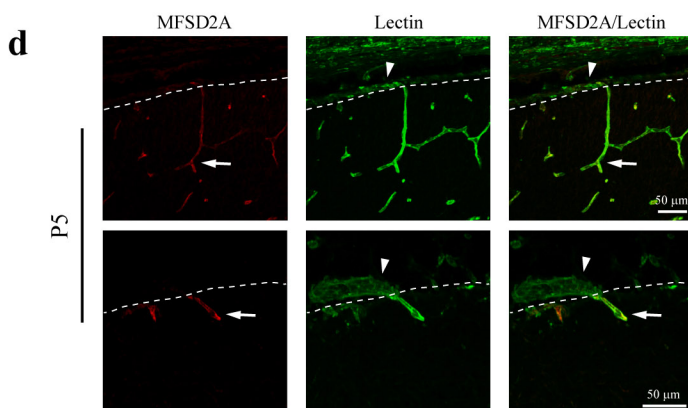

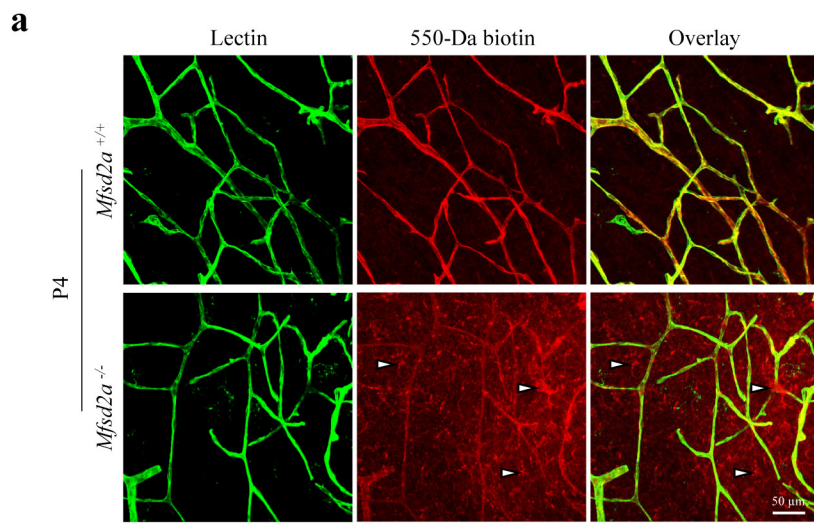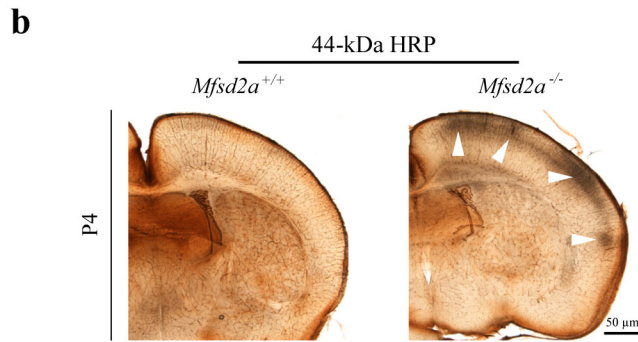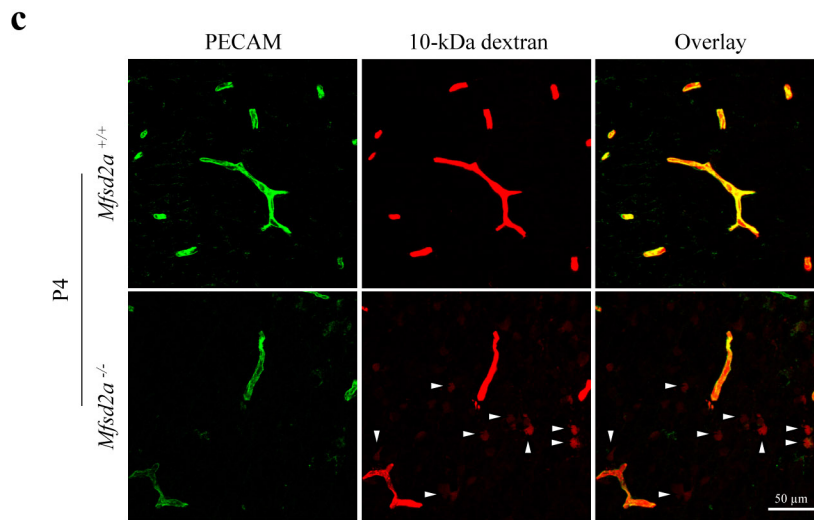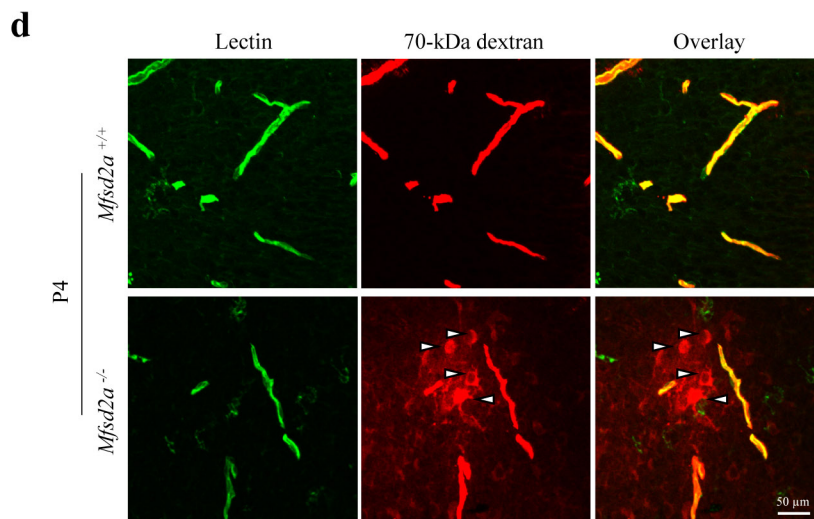

**a**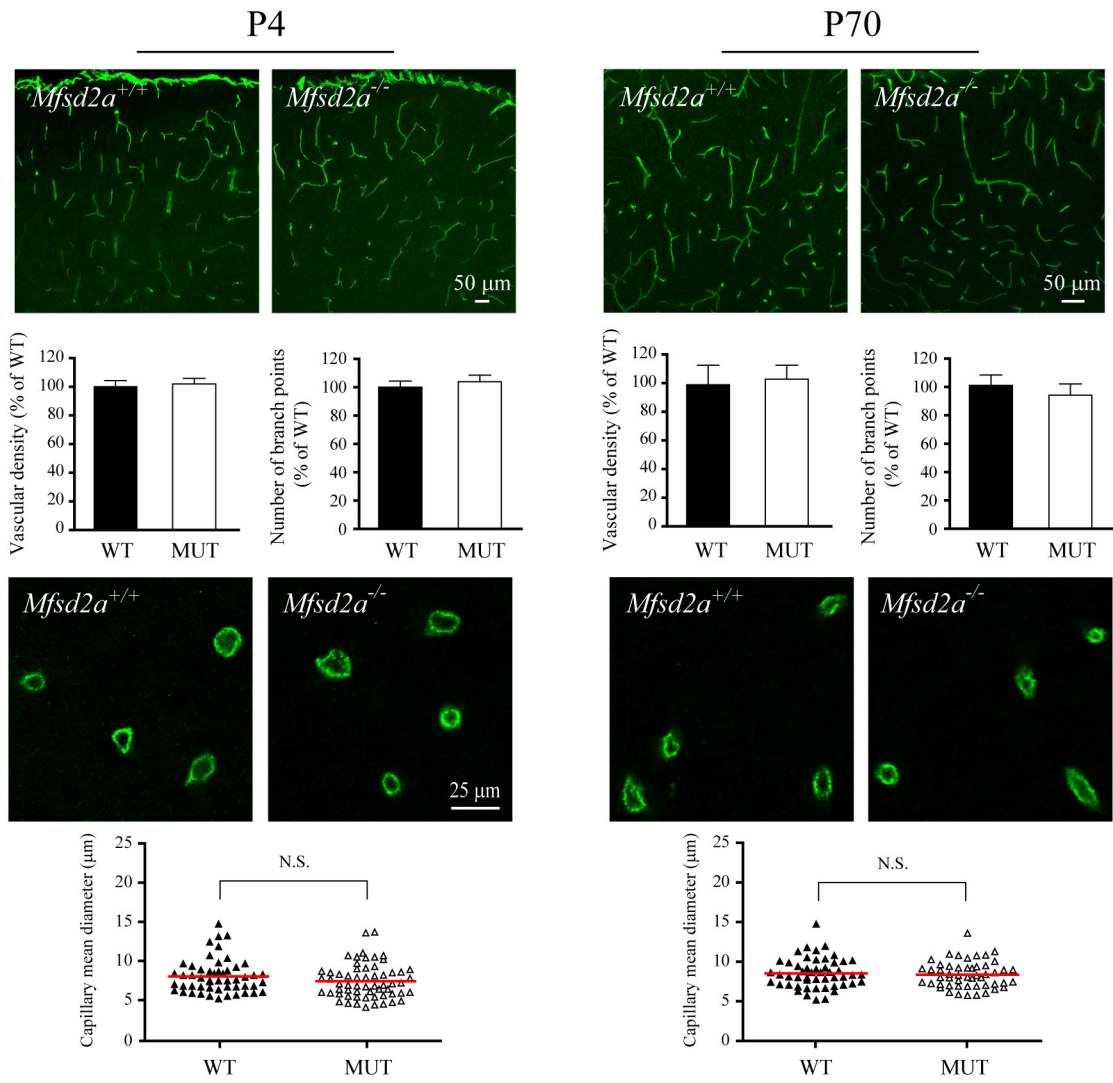**b**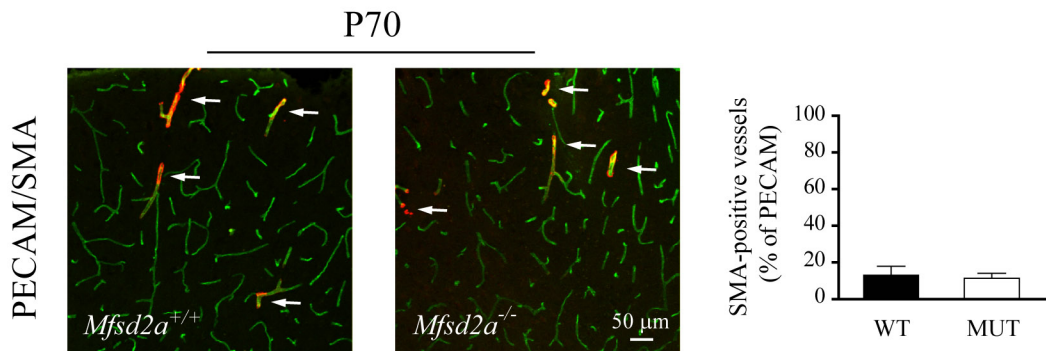**c**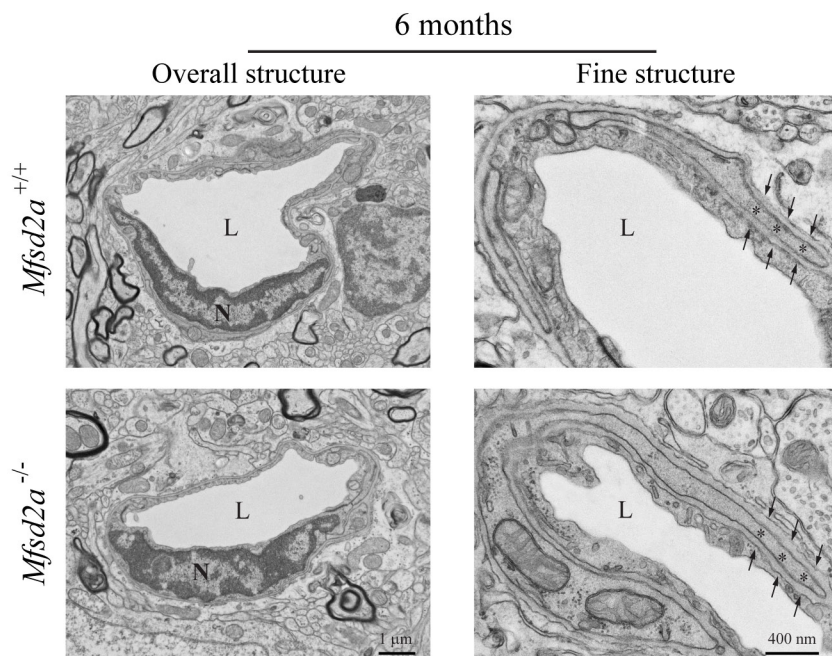

**a**

## Density of vesicles in the embryo brain endothelium (E17.5)

| Tissue source                | No. of endothelial profiles | No. of vesicles | Mean vesicular density        |                                |                                          |                          |
|------------------------------|-----------------------------|-----------------|-------------------------------|--------------------------------|------------------------------------------|--------------------------|
|                              |                             |                 | Luminal type I vesicles (/μm) | Luminal type II vesicles (/μm) | Cytoplasmic vesicles (/μm <sup>2</sup> ) | Abluminal vesicles (/μm) |
| Controls                     | 40                          | 1180            | 0.34 ± 0.05                   | 0.14 ± 0.03                    | 2.04 ± 0.06                              | 0.21 ± 0.03              |
| <i>Mfsd2a</i> <sup>-/-</sup> | 40                          | 2449            | 0.62 ± 0.03 **                | 0.38 ± 0.03 ***                | 4.62 ± 0.30 ***                          | 0.48 ± 0.04 ***          |

**b**

## Density of HRP-filled vesicles in adult brain endothelium (P90)

| Tissue source                | No. of endothelial profiles | No. of HRP-filled vesicles | Cytoplasmic HRP <sup>+</sup> vesicles (/μm <sup>2</sup> ) |
|------------------------------|-----------------------------|----------------------------|-----------------------------------------------------------|
| Controls                     | 15                          | 0                          | 0                                                         |
| <i>Mfsd2a</i> <sup>-/-</sup> | 15                          | 97                         | 3.35 ± 0.55                                               |

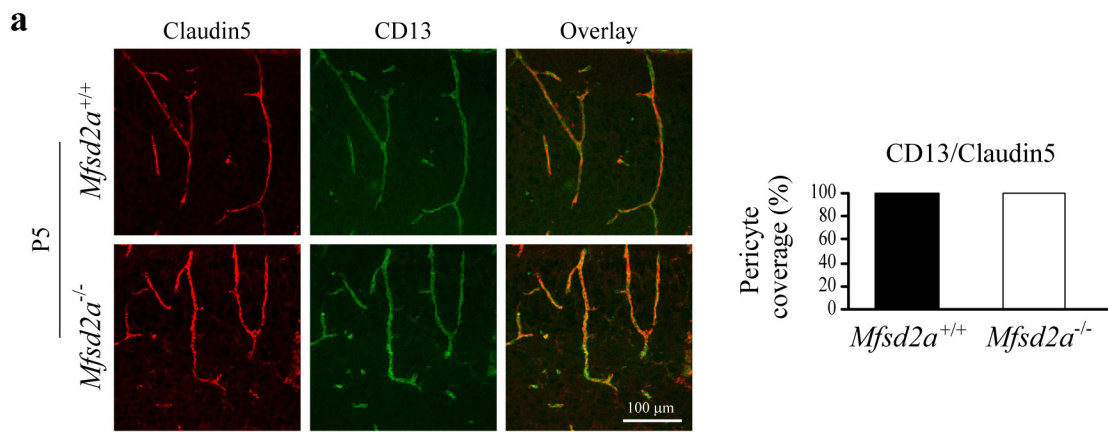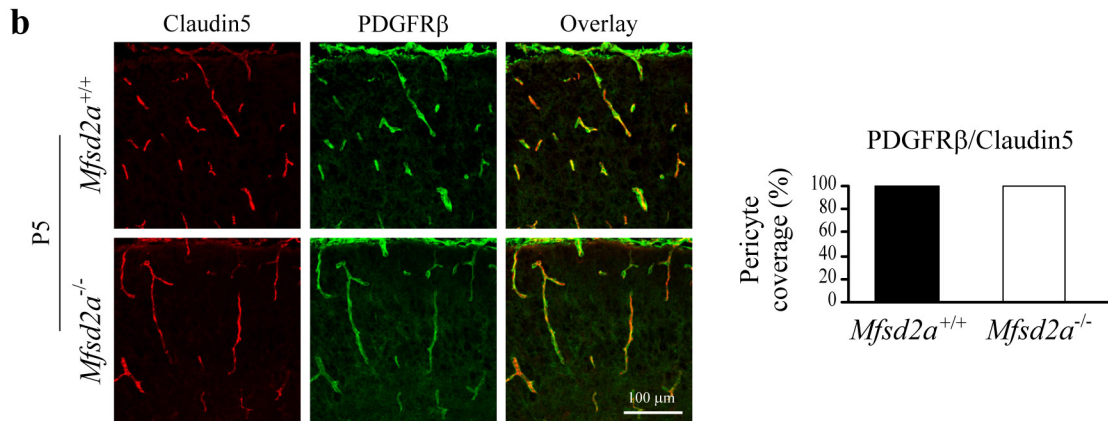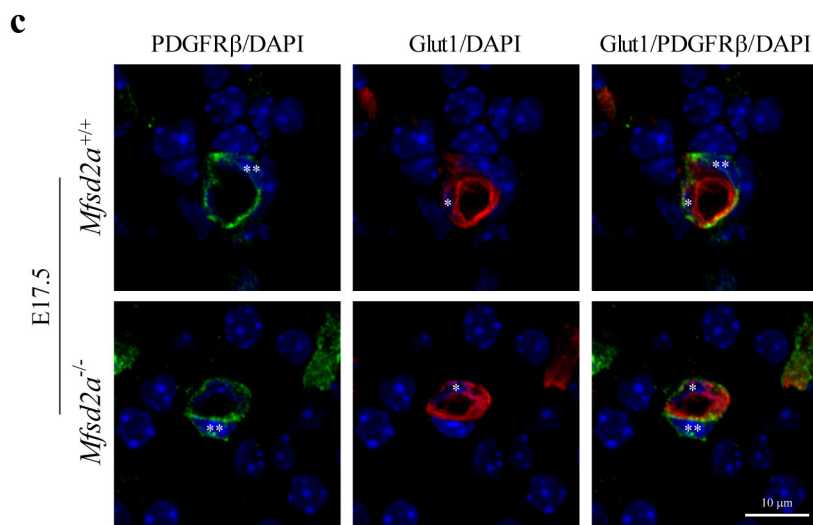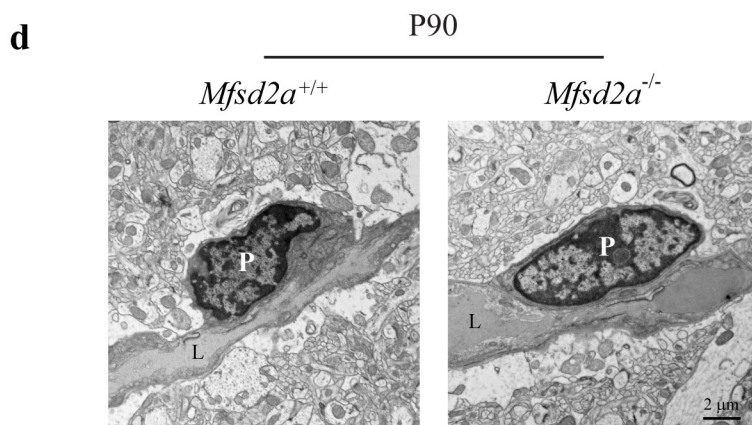



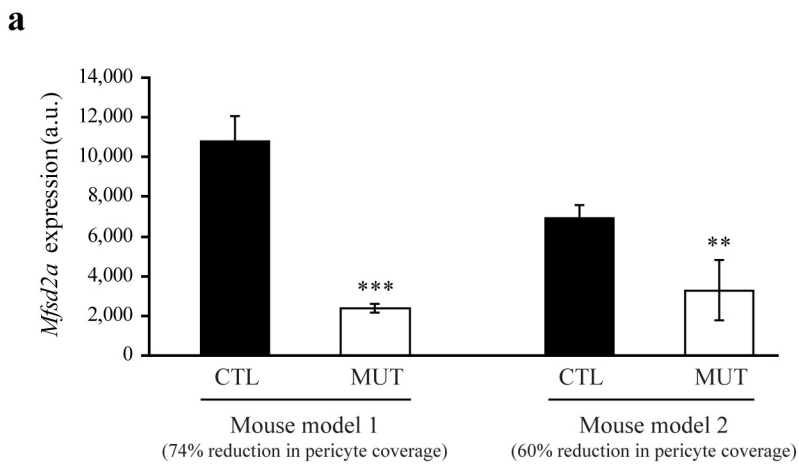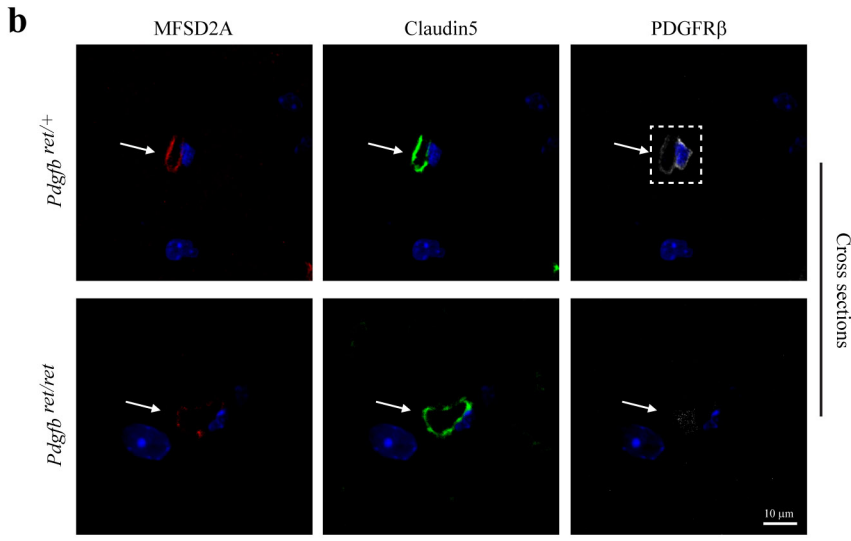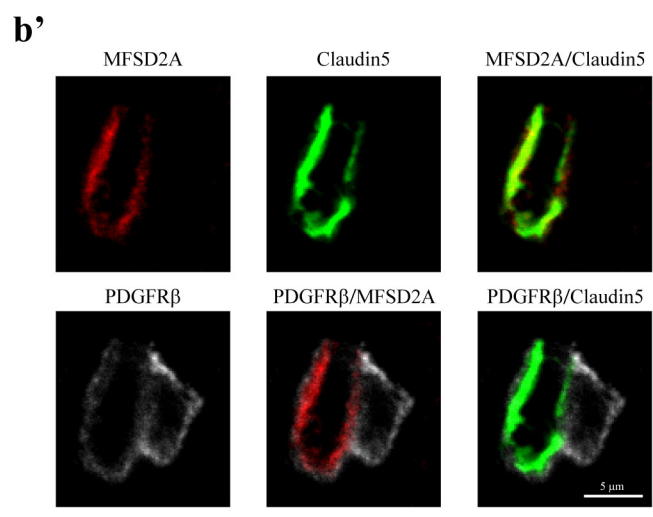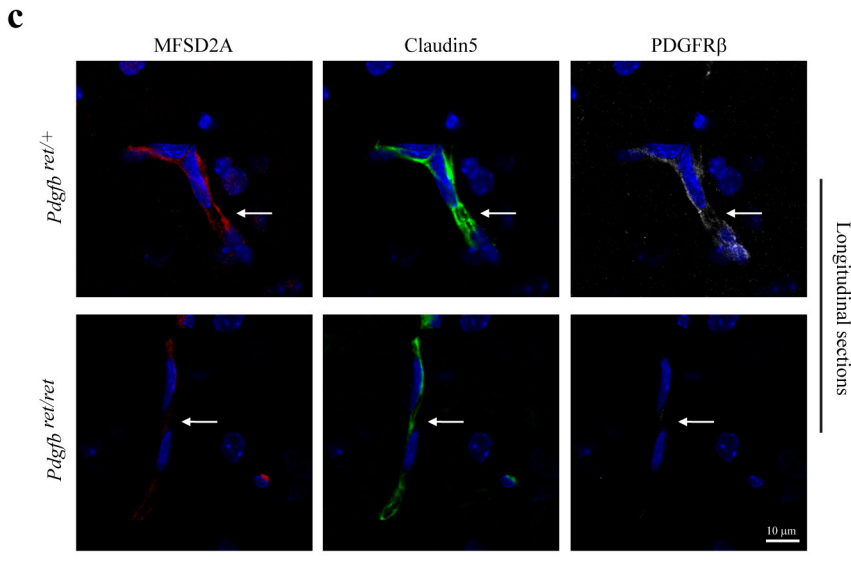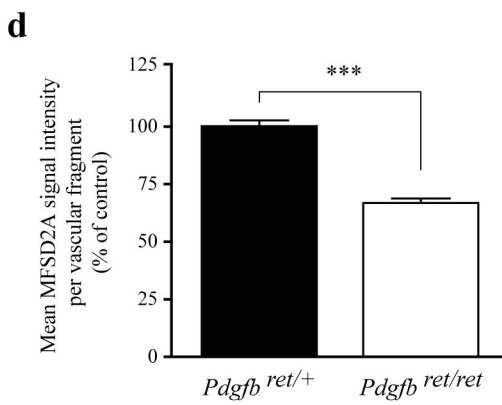

**a**

Wild-type

*Mfsd2a*<sup>-/-</sup>

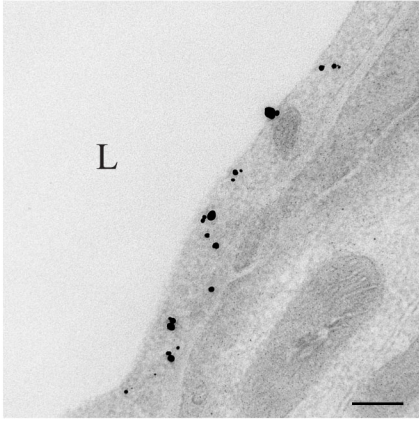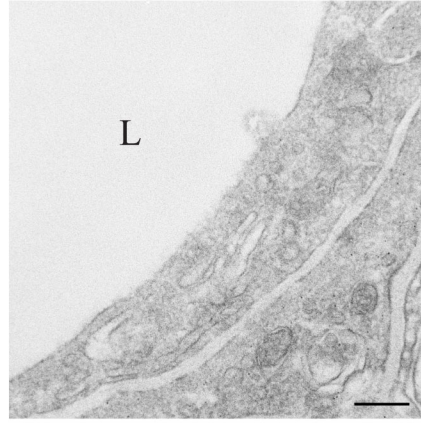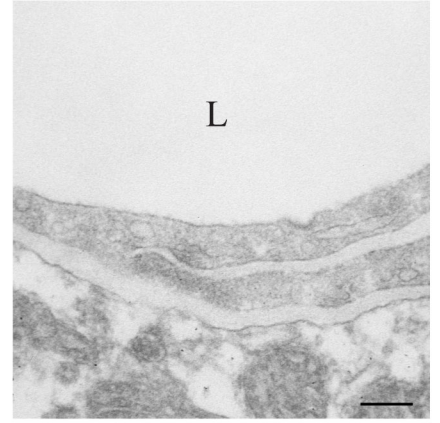

**b**

Wild-type

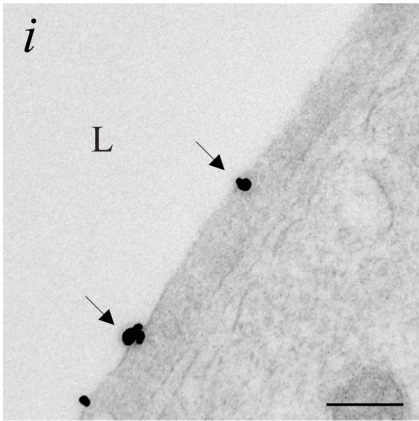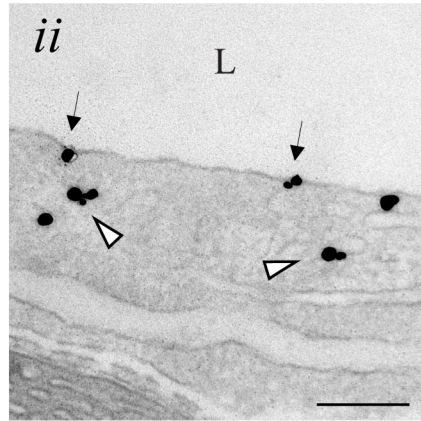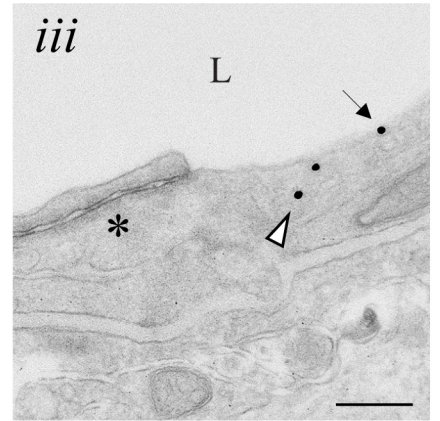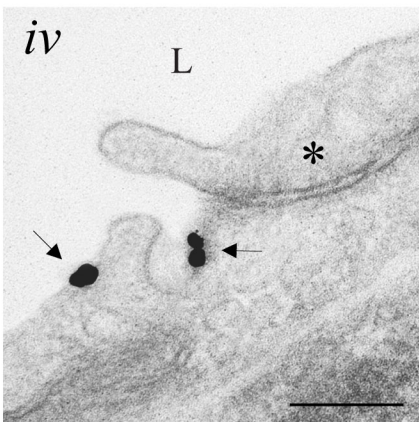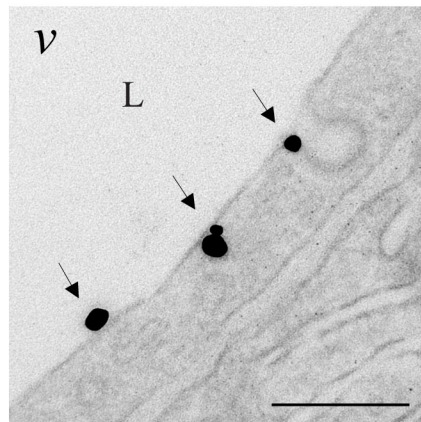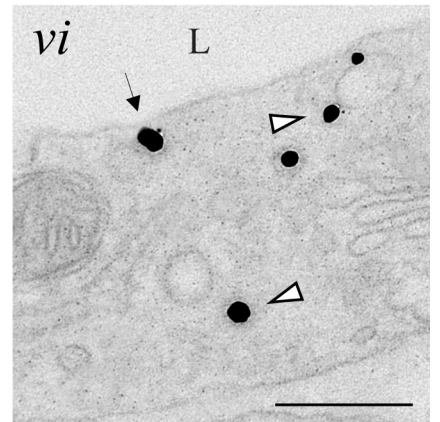

Supplement: NIHMS612295-supplement-extended_figures.pdf [file NIHMS612295-supplement-extended_figures.pdf]
